# Supplementary material for: Pharmacist-Driven Alcohol Use Disorder Screening May Increase Inpatient Utilization of Extended-Release Naltrexone: A Single Center Pilot Study
Source: MDPI journal article supplement (doi:10.3390/pharmacy12010026), 2024-02-01
Supplement: s1 [file s1]

### Pharmacist-Driven Extended-Release Naltrexone Screening Tool

| Extended-Release Naltrexone (XR-NTX) Screening Tool                                                                                                                                                                                        |                                         |                                               |
|--------------------------------------------------------------------------------------------------------------------------------------------------------------------------------------------------------------------------------------------|-----------------------------------------|-----------------------------------------------|
| HPI:                                                                                                                                                                                                                                       |                                         |                                               |
| Allergies:                                                                                                                                                                                                                                 |                                         |                                               |
| Ht/ Wt:                                                                                                                                                                                                                                    |                                         |                                               |
| Pregnancy/Lactation Status:                                                                                                                                                                                                                |                                         |                                               |
| Urine Drug Screen:                                                                                                                                                                                                                         |                                         |                                               |
| <input type="checkbox"/> Methamphetamine/<br>Amphetamine                                                                                                                                                                                   | <input type="checkbox"/> Benzodiazepine | <input type="checkbox"/> Phencyclidine        |
| <input type="checkbox"/> MDMA                                                                                                                                                                                                              | <input type="checkbox"/> Cocaine        | <input type="checkbox"/> Barbiturate          |
| <input type="checkbox"/> Methadone                                                                                                                                                                                                         | <input type="checkbox"/> Buprenorphine  | <input type="checkbox"/> Opiates              |
| <input type="checkbox"/> THC                                                                                                                                                                                                               | <input type="checkbox"/> TCA            | <input type="checkbox"/> Ethyl Alcohol: _____ |
| <b>Based on the following criteria, the patient is a candidate for XR-NTX (Vivitrol®).</b>                                                                                                                                                 |                                         |                                               |
| <input type="checkbox"/> Diagnosis of Alcohol Use Disorder<br>→ Amount of alcohol consumed:                                                                                                                                                |                                         |                                               |
| <input type="checkbox"/> Urine drug screens negative for opioids – DATE: _____                                                                                                                                                             |                                         |                                               |
| <input type="checkbox"/> History of tolerability to oral agents related to XR-NTX                                                                                                                                                          |                                         |                                               |
| <input type="checkbox"/> History of tolerability to XR-NTX                                                                                                                                                                                 |                                         |                                               |
| <b>Based on the following criteria, the patient is NOT candidate for XR-NTX (Vivitrol®).</b>                                                                                                                                               |                                         |                                               |
| <input type="checkbox"/> Actively on opioid treatment or withdrawing from opioids                                                                                                                                                          |                                         |                                               |
| <input type="checkbox"/> Opioid use within the past 7-10 days                                                                                                                                                                              |                                         |                                               |
| <input type="checkbox"/> Pregnant                                                                                                                                                                                                          |                                         |                                               |
| <input type="checkbox"/> Severe renal impairment                                                                                                                                                                                           |                                         |                                               |
| <input type="checkbox"/> AST/ALT $\geq$ 3x upper limit                                                                                                                                                                                     |                                         |                                               |
| <u>Meets XR-NTX Criteria:</u> Based on the above criteria, and the patient's substance abuse history, please consider the following to aid in medication adherence and increase time to first heavy drinking day:<br>Medication regimen... |                                         |                                               |
| <u>Does not meet XR-NTX Criteria:</u> Based on the above criteria, patient is not a candidate to receive Vivitrol at this time.<br>Pharmacist will continue to monitor medications.                                                        |                                         |                                               |

\*Use of this screening tool is restricted to those with express permission from the authors. Use must be cited appropriately.
